# Supplementary material for: Mutated nucleophosmin 1 as immunotherapy target in acute myeloid leukemia
Source: JCI journal article supplement (doi:10.1172/jci97482), 2019-01-13
Supplement: sd1 [file 1]

## Supplemental Methods

### *In vitro peptide stimulation*

PBMC harvested from AML patients who were in remission after chemotherapy were peptide stimulated *in vitro* following three different strategies. In strategy 1, PBMC were stimulated with HLA-A\*02:01-positive allogeneic irradiated EBV-LCL that were pulsed with 10  $\mu$ M CLAVEEVSL for 2 hrs at 37°C in IMDM supplemented with 2% FBS, 1.5% L-glutamine and 1% penicillin/streptomycin at a ratio of 5:1 (PBMC:EBV-LCL). PBMC were cultured in TCM without cytokines at a concentration of  $0.5 \times 10^6$  cells/ml in 48-wells flat-bottom culture plates. After 2 and 5 days, 100 IU/ml IL-2 and 10 ng/ml IL-15 (Miltenyi Biotec) were added. On day 11, bulk cultures were separately analyzed by flow cytometry. In strategy 2, PBMC were stimulated with 20  $\mu$ M CLAVEEVSL at a concentration of  $10^7$  cells/ml in IMDM supplemented with 2% FBS, 1.5% L-glutamine, 1% penicillin/streptomycin. After 2 hrs of incubation at 37°C, PBMC were diluted to  $0.5 \times 10^6$  cells/ml in 48-wells flat-bottom culture plates in TCM with 20 IU/ml IL-2. After 3 and 6 days, 100 IU/ml IL-2 and 10 ng/ml IL-15 were added. On day 11, PBMC were re-stimulated with HLA-A\*02:01-positive allogeneic irradiated PBMC that were pulsed with 10  $\mu$ M CLAVEEVSL as described above at a ratio of 5:1 (allogeneic PBMC:PBMC) in TCM with 100 IU/ml IL-2. On day 21, bulk cultures were separately analyzed by flow cytometry. In strategy 3, PBMC were stimulated as described for strategy 2 with the exception that PBMC were re-stimulated on day 11 with HLA-A\*02:01-positive allogeneic PBMC in the presence of 0.8  $\mu$ g/ml PHA but absence of CLAVEEVSL. For all 3 strategies flow cytometric analysis was performed on PBMC directly after thawing before peptide stimulation and on day 11 or 21 after peptide stimulation. For FACS analysis, all bulk cultures of approximately  $1 \times 10^6$  peptide-stimulated PBMC each were stained with FITC-conjugated antibodies against CD4, CD14, CD16 (Cat. No. 335035) and CD19, a Pacific Blue-conjugated antibody against CD8 (Cat. No. 558207) (BD Biosciences) and  $\Delta$ NPM1-CLA tetramers conjugated to APC and PE to allow for combinatorial coding. Zombie Aqua was included as live/dead dye. Cells were measured on a BD LSR II using BD FACSDiva v6 software and analysis was performed with FlowJo software.

### *Antibodies and FACS analysis of primary AML*

Primary AML were stained with Alexa Fluor 700-conjugated anti-CD33 (Cat. No. 561160), Brilliant Violet 421-conjugated anti-CD34 (Cat. No. 562577), FITC-conjugated anti-CD58 (Cat. No. 555920), PE-conjugated anti-CD80 (Cat. No. 557227), PE-CF594-conjugated anti-CD86 (Cat. No. 562390) (BD Biosciences) and APC-conjugated anti-CD54 (Cat. No. 353112,

Biolegend). HLA-A\*02:01 staining was performed indirectly with a mouse antibody against human HLA-A\*02:01 (BB7.2) and FITC-conjugated goat anti-mouse Ig (Cat. No. 349031, BD Biosciences). After HLA-A\*02:01 staining, cells were blocked with 5% mouse serum, washed and stained with Alexa Fluor 700-conjugated anti-CD33 or Brilliant Violet 421-conjugated anti-CD34. Zombie Aqua was included as live/dead dye. Cells were measured on a BD LSR II using BD FACSDiva v6 software and analysis was performed with FlowJo software.

# Supplemental Figures

## Figure S1

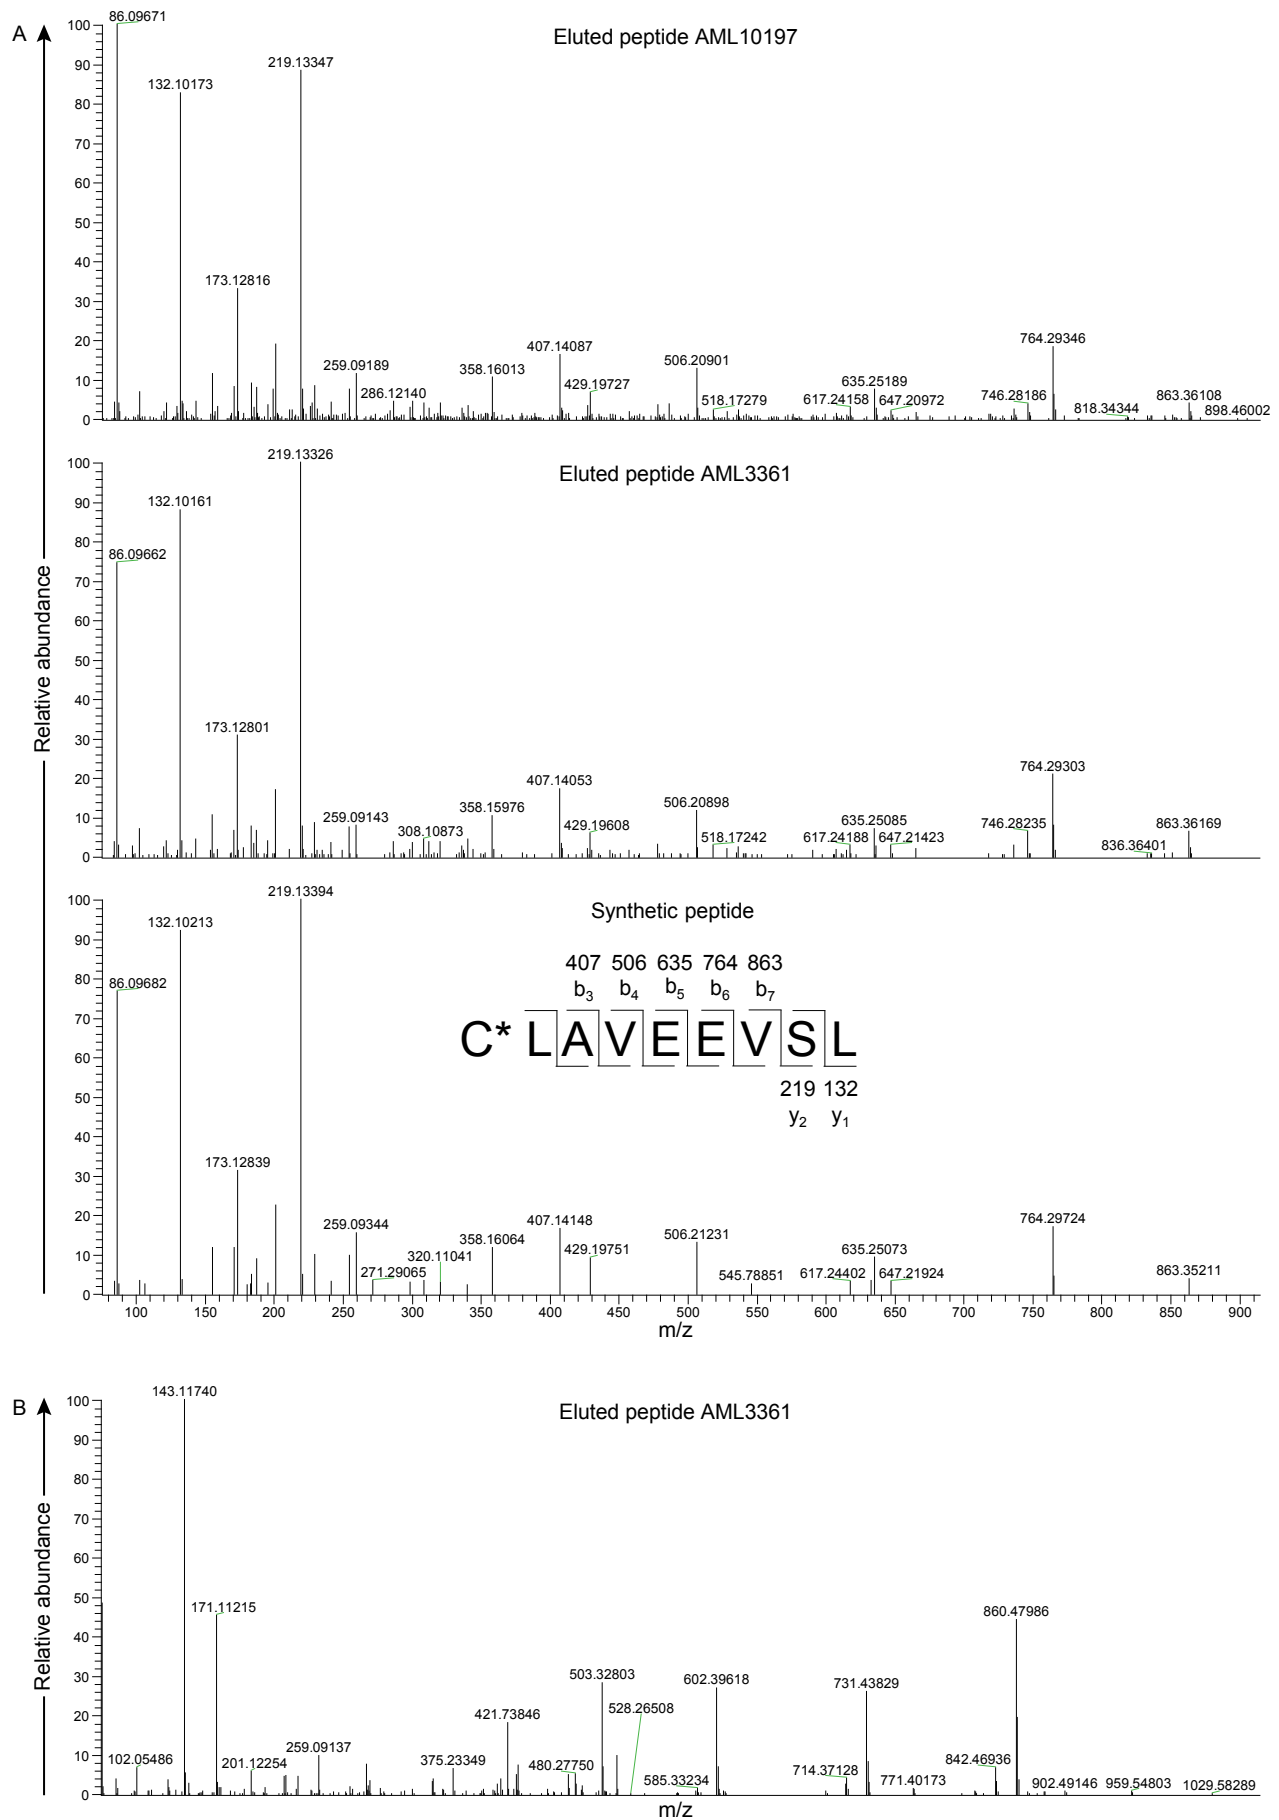

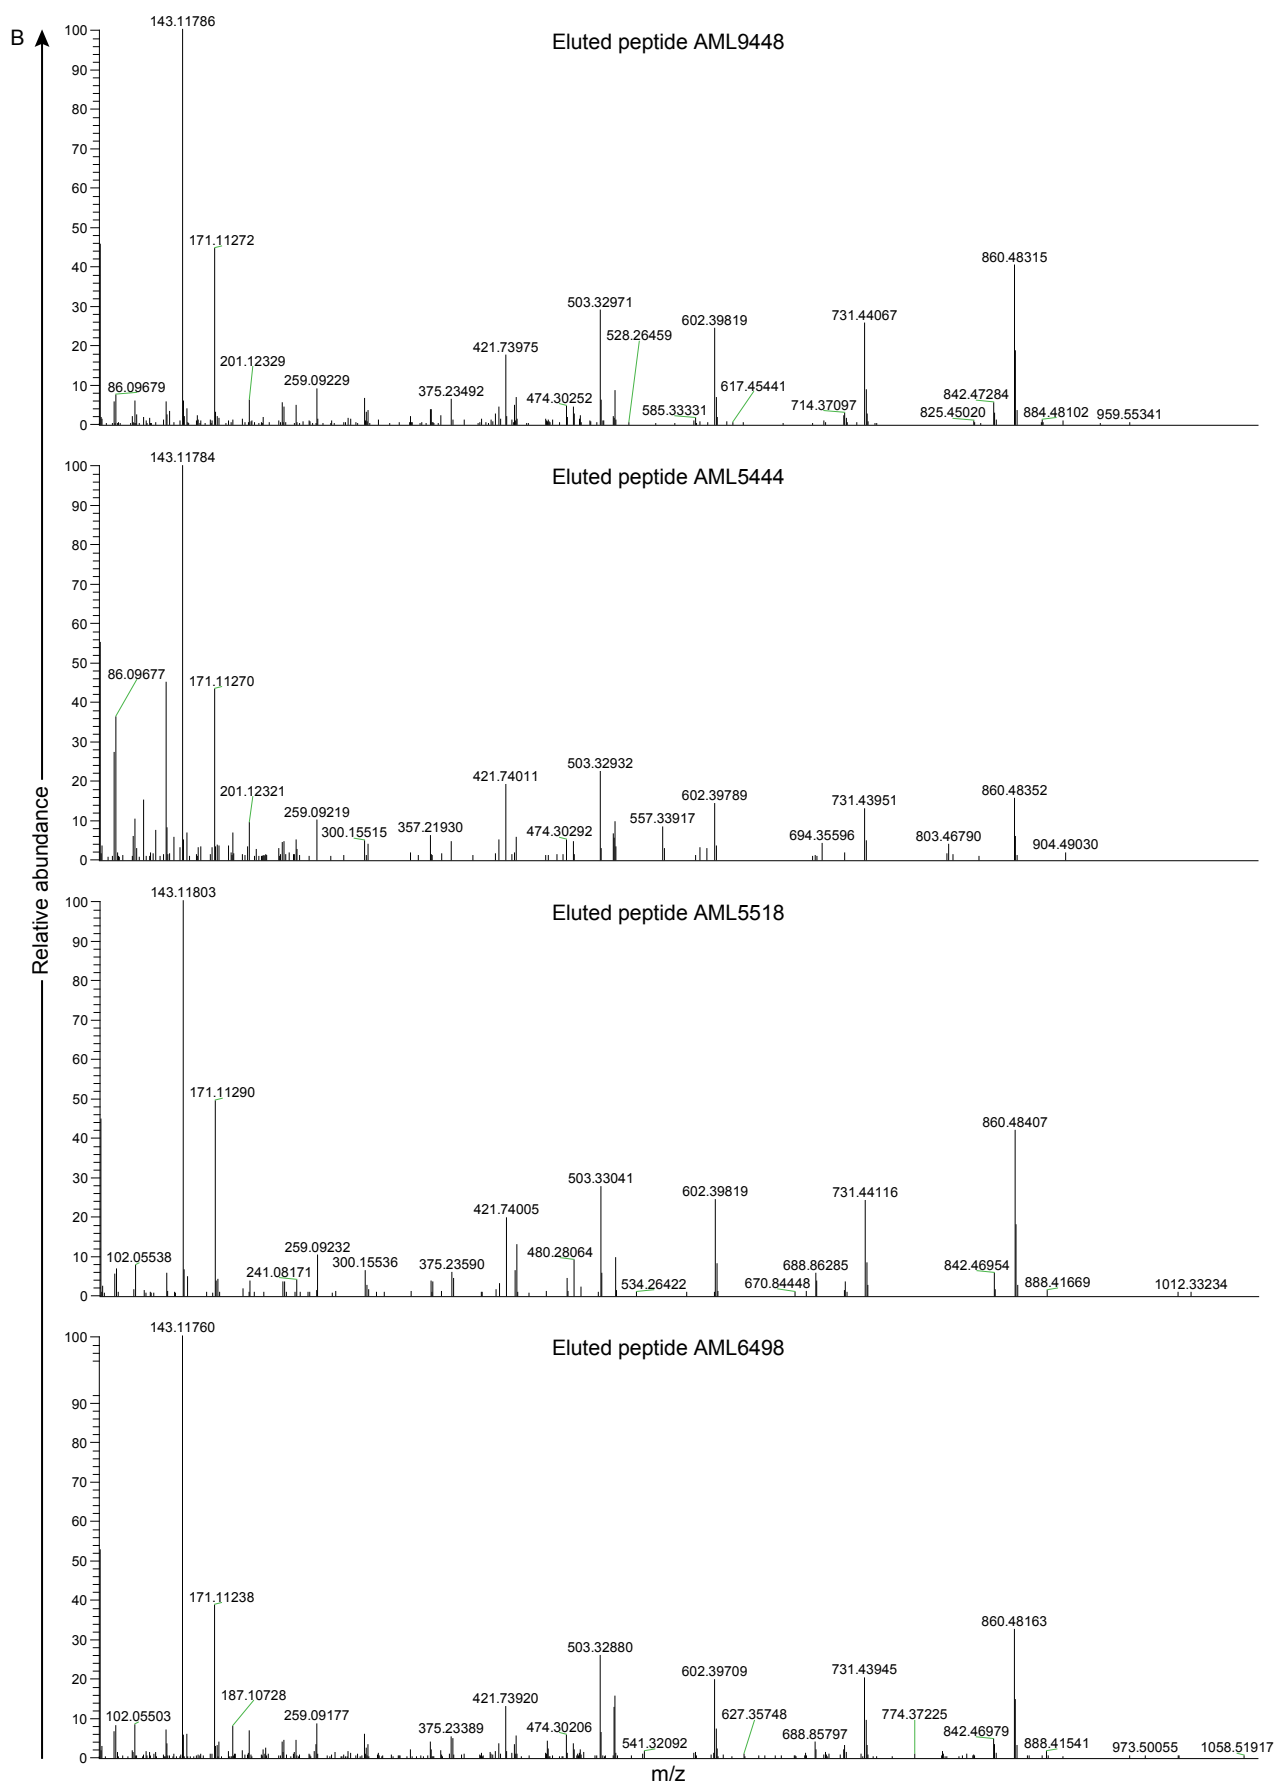

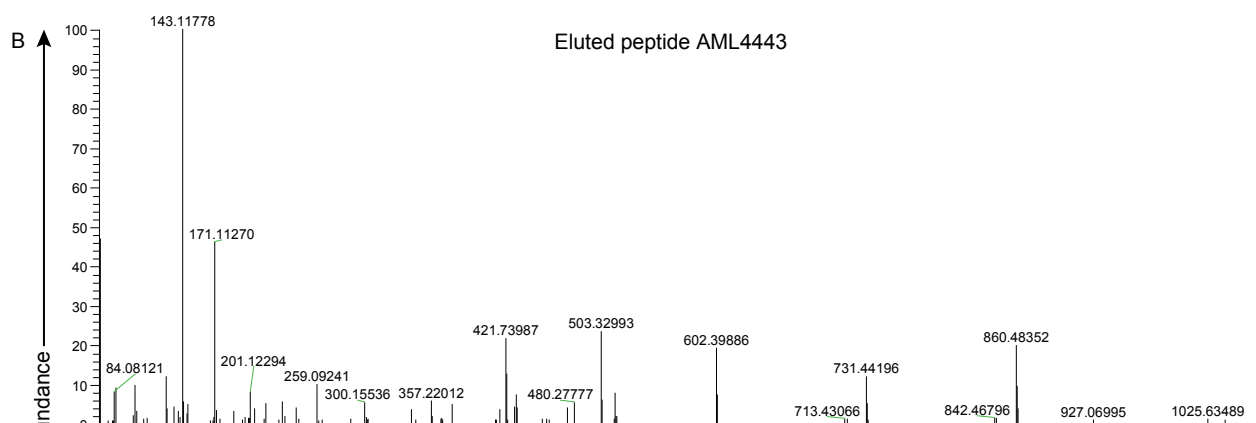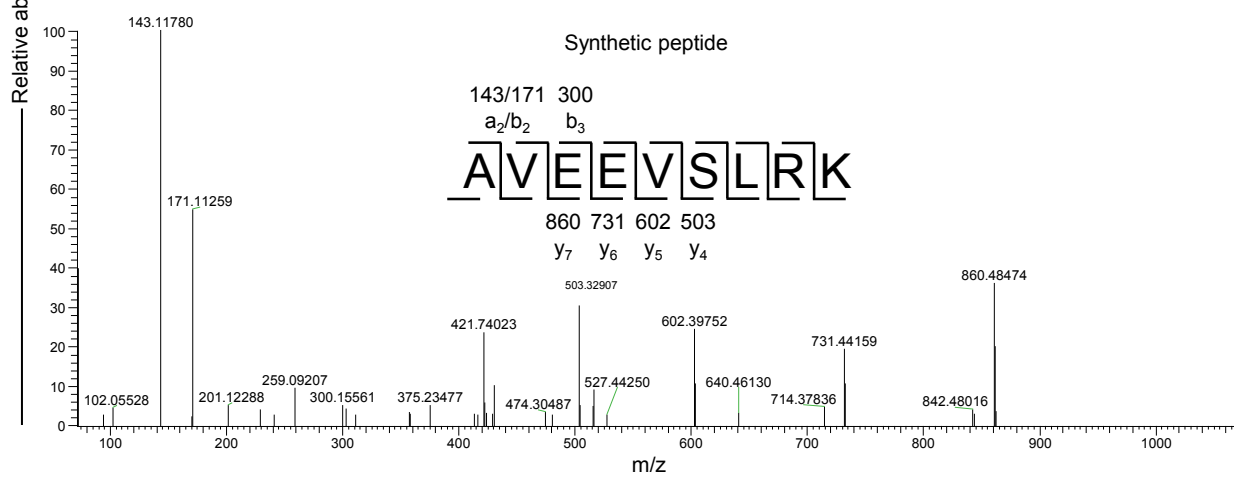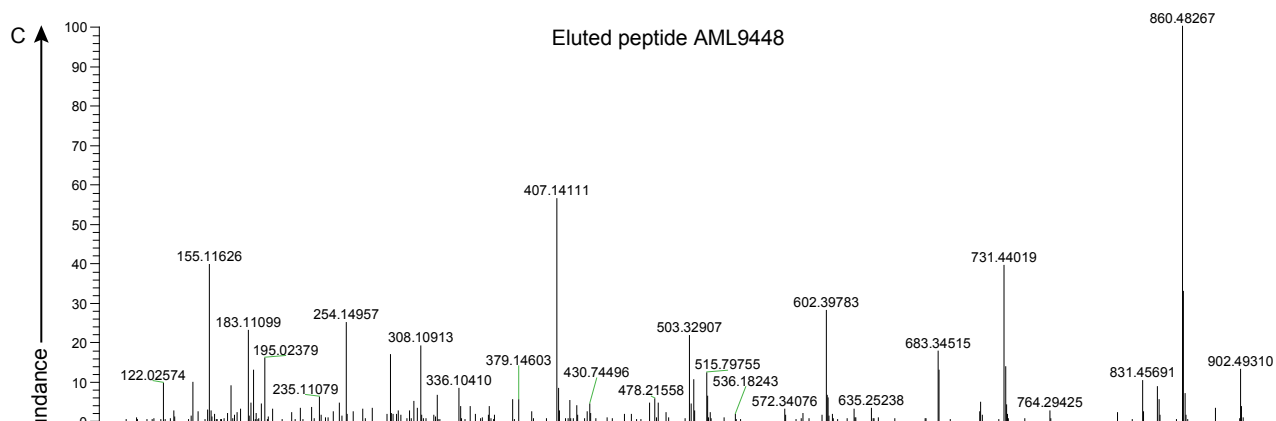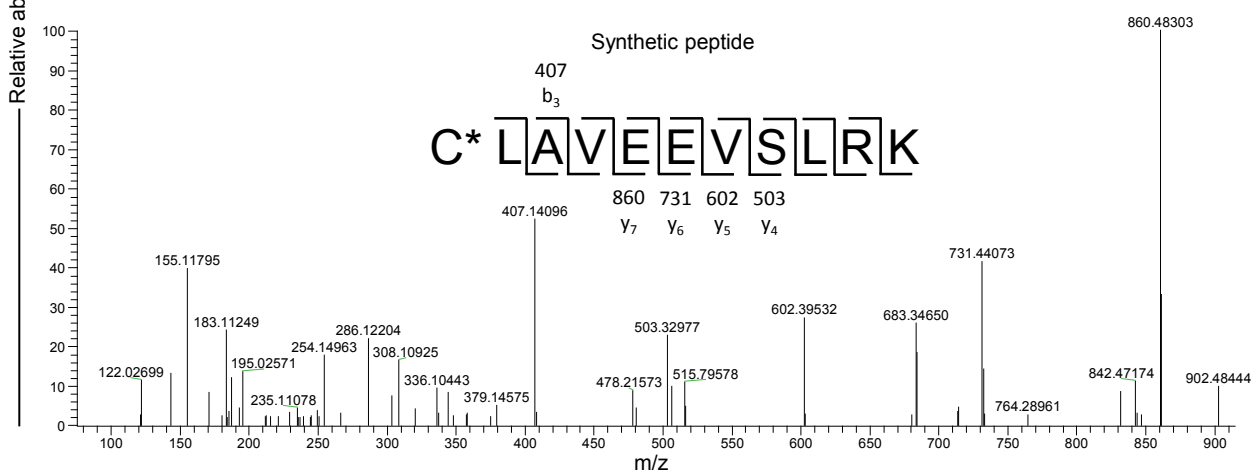

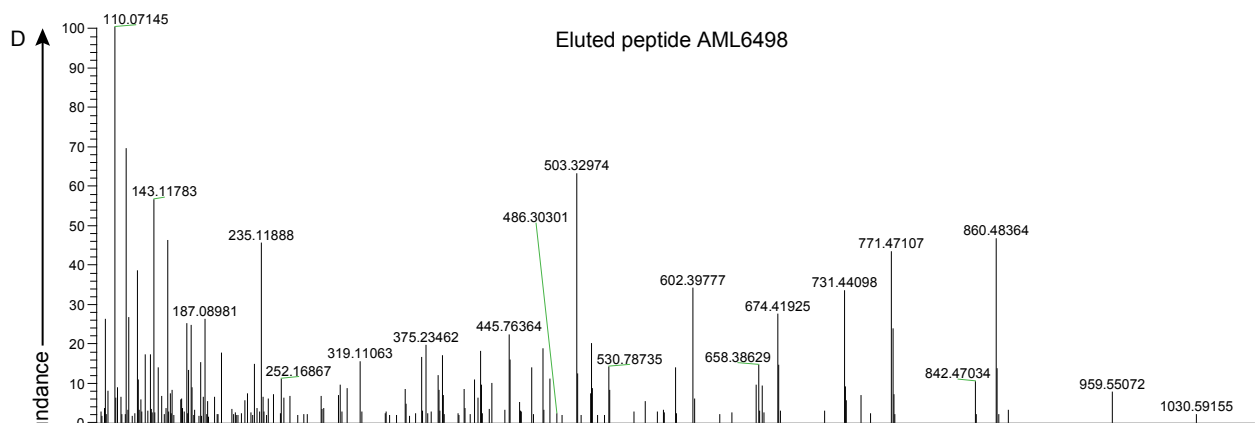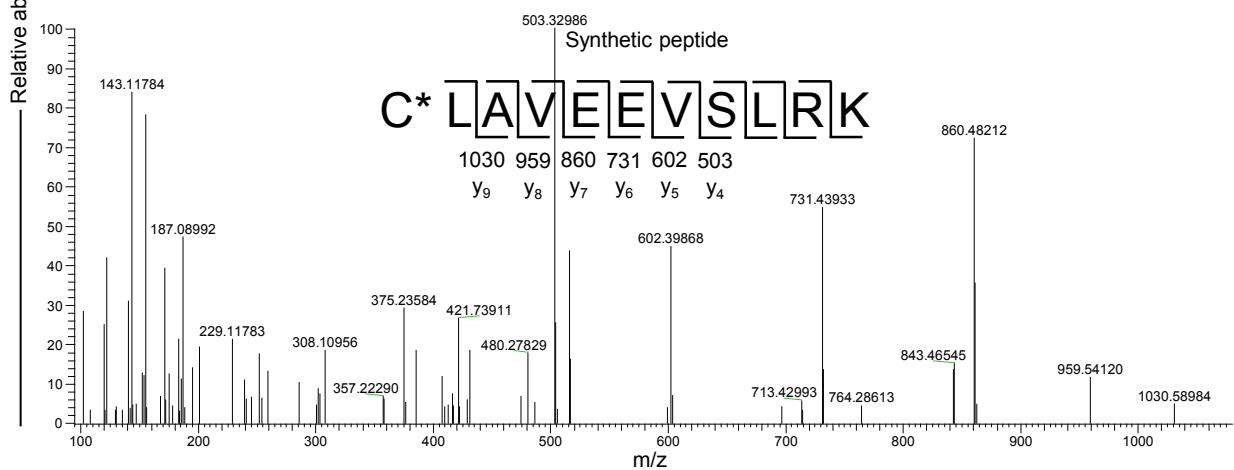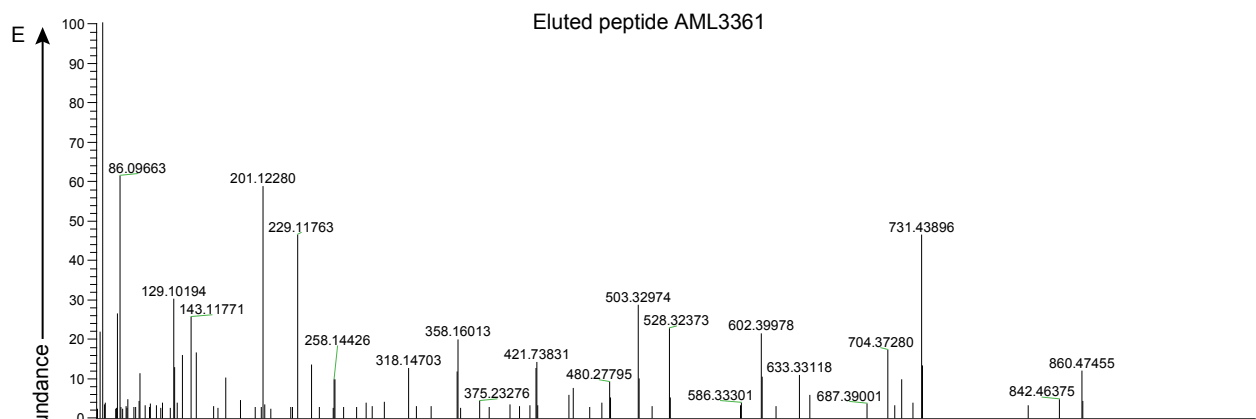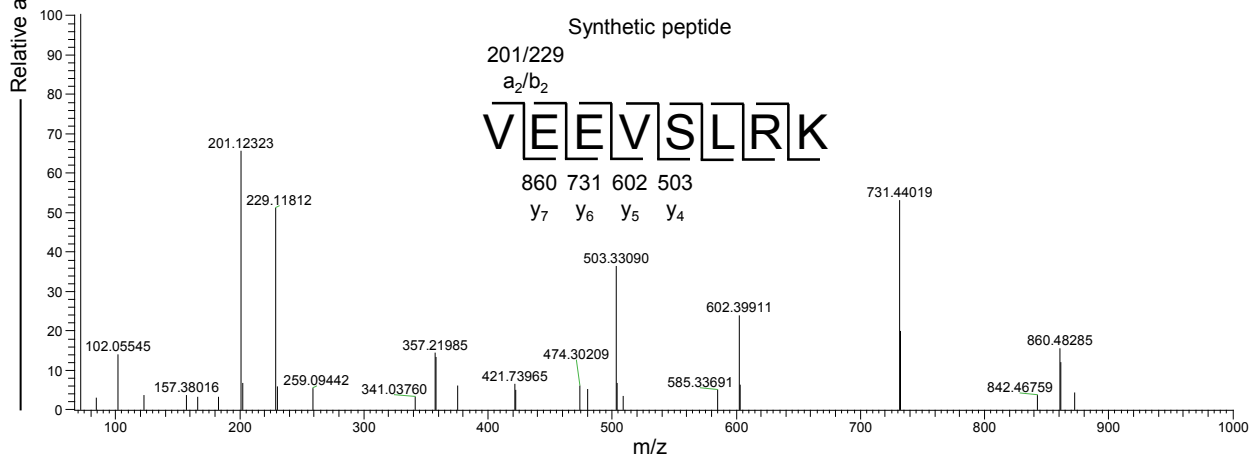

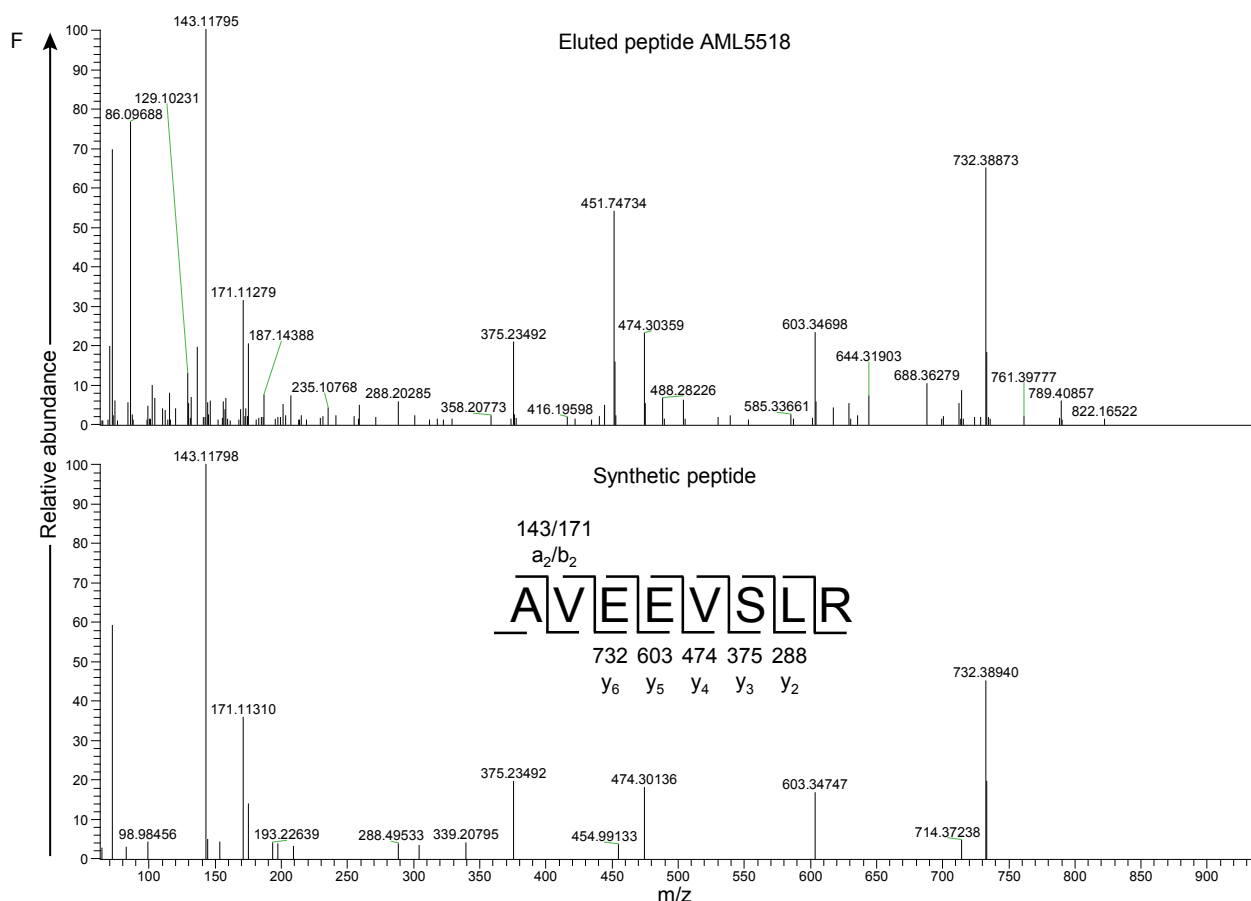

**Figure S1. Validation of  $\Delta$ NPM1-derived peptides eluted from primary AML.**  $\Delta$ NPM1-derived peptides were validated as HLA-binding peptides on primary AML by comparing tandem mass spectra between eluted peptides from AML and synthetic peptides. Matching tandem mass spectra are shown. C\*=cysteinylation of the Cys-residue. (A) Tandem mass spectra for eluted peptides from AML10197 (upper) and AML 3361 (middle) and synthetic peptide C\*LAVEEVSL (lower). (B) Tandem mass spectra for eluted peptides from AML3361 (first), AML9448 (second), AML5444 (third), AML5518 (fourth), AML6498 (fifth) and AML4443 (sixth) and synthetic peptide AVEEVSLRK (last). (C) Tandem mass spectra for an eluted peptide from AML9448 (upper) and synthetic peptide C\*LAVEEVSLRK (lower). (D) Tandem mass spectra for an eluted peptide from AML6498 (upper) and synthetic peptide C\*LAVEEVSLRK (lower). (E) Tandem mass spectra for an eluted peptide from AML3361 (upper) and synthetic peptide VEEVSLRK (lower). (F) Tandem mass spectra for an eluted peptide from AML5518 (upper) and synthetic peptide AVEEVSLR (lower).

**Figure S2**

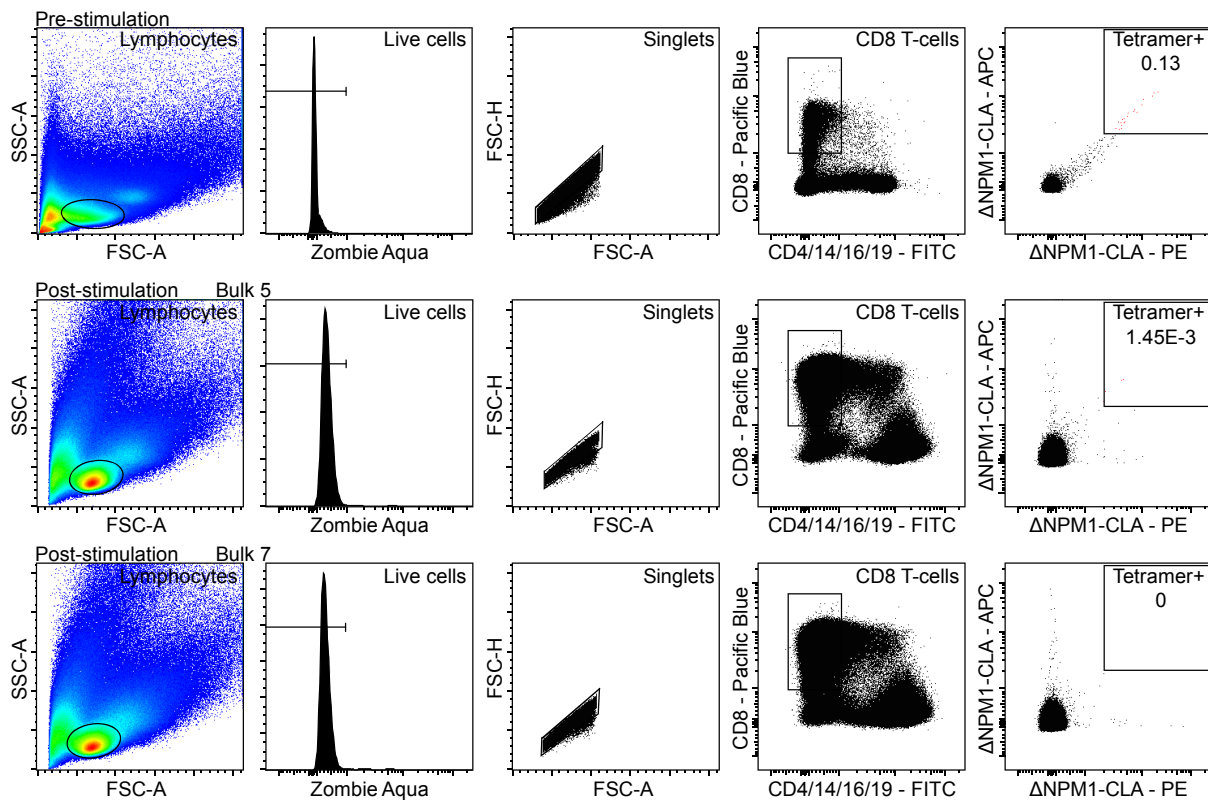

**Figure S2. Screening for  $\Delta$ NPM1-specific T-cells in a representative patient with AML after in vitro peptide stimulation.** PBMC from AML patients who were in remission after chemotherapy were thawed and stimulated in vitro with CLAVEEVSL. A minimum of  $1 \times 10^6$  total events were analyzed by flow cytometry before (pre-stimulation) and after (post-stimulation) peptide stimulation. Cells were stained with a Pacific Blue anti-CD8 antibody, a mix of FITC-conjugated anti-CD4, anti-CD14, anti-CD16 and anti-CD19 antibodies and  $\Delta$ NPM1-CLA tetramers conjugated to APC and PE. Zombie Aqua was used as live/dead dye. A representative screening for  $\Delta$ NPM1-specific T-cells using combinatorial coding APC- and PE-conjugated  $\Delta$ NPM1-CLA tetramers is shown for patient AML11282. Viable Zombie Aqua-negative single cells were selected and gated for Pacific Blue-positive FITC-negative CD8 T-cells. Within this CD8 population, T-cells that were double positive for APC- and PE-conjugated  $\Delta$ NPM1-CLA tetramers were counted. Data are shown for PBMC before peptide stimulation (upper) and two of the 14 bulk cultures after peptide stimulation (culture 5: middle; culture 7: lower).

**Figure S3**

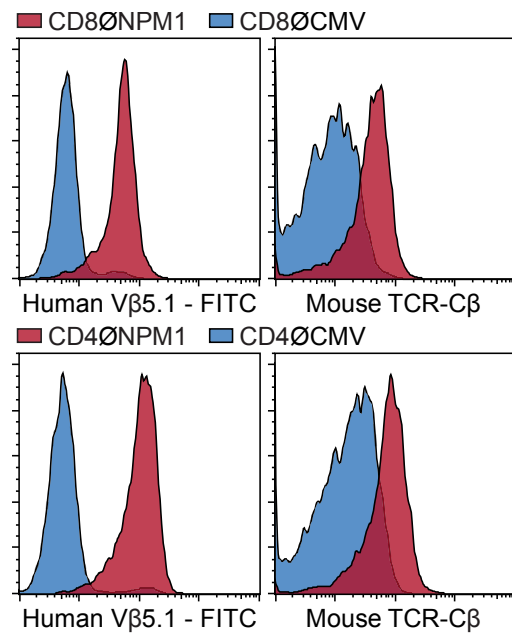

**Figure S3. TCR staining after  $\Delta$ NPM1 TCR gene transfer.** TCR-transduced T-cells were analyzed by flow cytometry at day 7 after transduction using anti-mouse TCR-C $\beta$  - APC and anti-human TCR-V $\beta$ 5.1 - FITC antibodies. All TCR-transduced T-cells stained positive for mouse TCR-C $\beta$ . T-cells transduced with the TCR for  $\Delta$ NPM1 (CD8 $\emptyset$ NPM1 and CD4 $\emptyset$ NPM1) were also positive for human TCR-V $\beta$ 5.1 (left panels). Results are shown for donor 1.

**Figure S4**

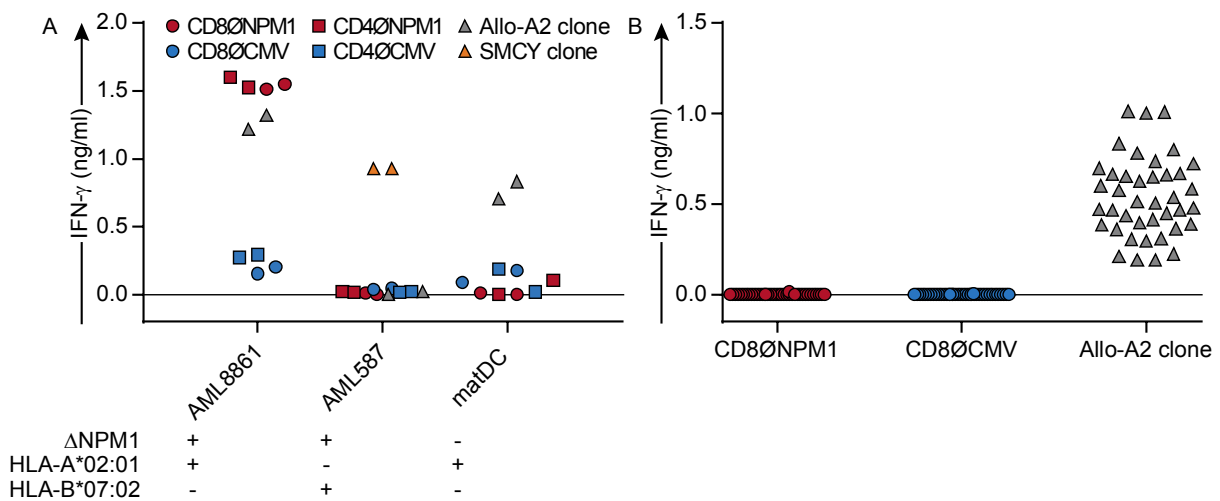

**Figure S4. Lack of T cell reactivity against control samples.** (A) TCR-transduced T-cells were tested for reactivity against autologous monocyte-derived mature DC (matDC) and AML with  $\Delta$ NPM1 that were HLA-A\*02:01-positive (AML8861) or -negative (AML587) by IFN- $\gamma$  ELISA. CD8 (CD8ØNPM1; red circles) and CD4 (CD4ØNPM1; red squares) T-cells with the TCR for  $\Delta$ NPM1 reacted against AML8861, but not against AML587 or autologous mature DC, whereas CD8 (CD8ØCMV; blue circles) and CD4 (CD4ØCMV; blue squares) T-cells with the CMV-specific TCR failed to recognize both AML samples and autologous mature DC. The allo-A2 clone (grey triangles) is included as a positive control for the autologous matDC and AML8861. The HLA-B\*07:02-restricted SMCY-specific CD8 T-cell clone (orange triangles) is included as a positive control for the HLA-A\*02:01-negative, but HLA-B\*07:02-positive AML587 which was loaded with an HLA-B\*07:02-binding SMCY peptide. Release of IFN- $\gamma$  (ng/ml) in duplicate wells is shown for donor 2. (B) TCR-transduced CD8 T-cells were tested for recognition of a panel of 40 HLA-A\*02:01-positive allogeneic EBV-LCL by IFN- $\gamma$  ELISA. No reactivity against EBV-LCL was observed for either CD8ØNPM1 (red circles) or CD8ØCMV (blue circles). The allo-A2 clone (grey triangles) is included as positive control. Mean release of IFN- $\gamma$  (ng/ml) in duplicate wells is shown for donor 1.

## Supplemental Tables

**Table S1. HLA class I binding prediction by NetMHCpan 3.0**

| Peptide     | Predicted HLA class I binding affinity (nM) |         |         |         |                                        |
|-------------|---------------------------------------------|---------|---------|---------|----------------------------------------|
|             | A*01:01                                     | A*02:01 | A*03:01 | A*11:01 | Other HLA class I alleles <sup>A</sup> |
| CLAVEEVSL   | 27798.0                                     | 592.2   | NA      | 33678.3 | ≥3562.6                                |
| AVEEVSLRK   | 16147.9                                     | 36154.8 | 534.4   | 58.2    | ≥1755.9                                |
| CLAVEEVSLRK | NA                                          | NA      | 498.2   | 1111.8  | ≥5404.5                                |
| AVEEVSLR    | 31753.2                                     | NA      | NA      | NA      | ≥39787.9                               |
| VEEVSLRK    | NA                                          | 44597.1 | NA      | 15474.5 | ≥38325.9                               |

<sup>A</sup> Predicted binding affinity (nM) for all other HLA class I alleles as expressed by primary AML from which the indicated peptide has been eluted.

**Table S2. Direct isolation of  $\Delta$ NPM1-specific T-cells from patients with AML**

| <b>Patient</b> | <b>Days after diagnosis<sup>A</sup></b> | <b>PBMC<sup>B</sup><br/>(*10<sup>6</sup>)</b> | <b>Sorted T-cells<sup>C</sup></b> | <b>Growing clones</b> | <b>Tetramer clones<sup>D</sup></b> |
|----------------|-----------------------------------------|-----------------------------------------------|-----------------------------------|-----------------------|------------------------------------|
| AML10833       | 89                                      | 8.6                                           | 21                                | 1                     | 0                                  |
| AML9559        | 107                                     | 6.4                                           | 2                                 | 2                     | 0                                  |
| AML6395        | 69                                      | 10.6                                          | 6                                 | 2                     | 0                                  |
| AML11282       | 81                                      | 8.0                                           | 12                                | 0                     | -                                  |
| AML9423        | 98                                      | 9.0                                           | 0                                 | -                     | -                                  |
| AML10418       | 108                                     | 7.5                                           | 0                                 | -                     | -                                  |

<sup>A</sup> Number of days after diagnosis when peripheral blood for T-cell isolation was collected.

<sup>B</sup> Indicated are numbers of PBMC from HLA-A\*02:01-positive AML patients with  $\Delta$ NPM1 that are used for T-cell isolation.

<sup>C</sup> PBMC were stained with anti-CD8-Alexa Fluor 700 and a mix of PE-conjugated pHLA tetramers for CLAVEEVSL and its cysteinylated variant C\*LAVEEVSL. Indicated are numbers of tetramer-positive CD8 T-cells that are sorted.

<sup>D</sup> Number of growing T-cell clones positive for the  $\Delta$ NPM1-CLA or  $\Delta$ NPM1-C\*LA tetramer.

**Table S3.  $\Delta$ NPM1-specific T-cells in patients with AML after in vitro peptide stimulation**

| IVS <sup>A</sup> | Patient  | Days after diagnosis <sup>B</sup> | PBMC <sup>C</sup><br>(*10 <sup>6</sup> ) | # bulks | CD8 T-cells                                |                                             |
|------------------|----------|-----------------------------------|------------------------------------------|---------|--------------------------------------------|---------------------------------------------|
|                  |          |                                   |                                          |         | % Tetramer <sup>D</sup><br>pre-stimulation | % Tetramer <sup>E</sup><br>post-stimulation |
| 1                | AML10833 | 89                                | 4.9                                      | 10      | 0.051                                      | 0.000-0.005                                 |
|                  | AML9559  | 107                               | 3.2                                      | 7       | 0.044                                      | 0.000-0.009                                 |
| 2                | AML10833 | 89                                | 4.9                                      | 10      | 0.180                                      | 0.000-0.061                                 |
|                  | AML9559  | 107                               | 2.9                                      | 6       | 0.170                                      | 0.004-0.120                                 |
| 3                | AML11282 | 81                                | 7.0                                      | 14      | 0.130                                      | 0.000-0.001                                 |
|                  | AML10418 | 108                               | 6.5                                      | 13      | 0.083                                      | 0.000-0.002                                 |

<sup>A</sup> IVS, in vitro peptide stimulation strategy. Three different strategies for in vitro peptide stimulation have been followed as described in the supplemental methods.

<sup>B</sup> Number of days after diagnosis when peripheral blood for T-cell isolation was collected.

<sup>C</sup> Indicated are numbers of PBMC from HLA-A\*02:01-positive AML patients with  $\Delta$ NPM1 that are used for peptide stimulation.

<sup>D</sup> Percentage of CD8 T-cells that are positive for combinatorial coding  $\Delta$ NPM1-CLA-APC and  $\Delta$ NPM1-CLA-PE tetramers prior to peptide stimulation.

<sup>E</sup> Percentage of CD8 T-cells that are positive for combinatorial coding  $\Delta$ NPM1-CLA-APC and  $\Delta$ NPM1-CLA-PE tetramers after in vitro peptide stimulation. For each patient, the range of tetramer-positive CD8 T-cells in different bulk cultures is shown.

**Table S4: Flow cytometric analysis of primary AML**

| <b>AML</b> | <b>Leukemic cells (%)<sup>A</sup></b> | <b>HLA-A*02:01 (ΔMFI)<sup>B</sup></b> | <b>CD80 (MFI)</b> | <b>CD86 (MFI)</b> | <b>CD54 (MFI)</b> | <b>CD58 (MFI)</b> |
|------------|---------------------------------------|---------------------------------------|-------------------|-------------------|-------------------|-------------------|
| 9559       | 93                                    | 1126                                  | 455               | 3821              | 8918              | 2135              |
| 7170       | 92                                    | 1558                                  | 201               | 1178              | 5786              | 1379              |
| 8861       | 98                                    | 380                                   | 55                | 198               | 186               | 369               |
| 10418      | 99                                    | 159                                   | 46                | 92                | 152               | 319               |
| 10594      | 27                                    | 444                                   | 81                | 491               | 2451              | 524               |
| 10833      | 92                                    | 1437                                  | 262               | 1440              | 3438              | 1413              |
| 3361       | 100                                   | 1236                                  | 108               | 294               | 1218              | 720               |
| 6395       | 84                                    | 1195                                  | 233               | 1254              | 11287             | 2061              |
| 10197      | 90                                    | 331                                   | 71                | 439               | 3896              | 451               |
| 1775       | 80                                    | 514                                   | 58                | 91                | 1682              | 414               |
| 2250       | 61                                    | 880                                   | 54                | 115               | 1954              | 774               |
| 2467       | 40                                    | 895                                   | 77                | 281               | 8722              | 612               |
| 4716       | 80                                    | 690                                   | 61                | 100               | 1563              | 589               |
| EBV-LCL    | -                                     | 4245                                  | 7555              | 22823             | 24005             | 5072              |

<sup>A</sup> Percentages of leukemic cells as determined by CD33 or CD34 expression in peripheral blood samples used for flow cytometric analysis.

<sup>B</sup> HLA-A\*02:01 staining was performed indirectly with a mouse antibody against human HLA-A\*02:01 (BB7.2) and FITC-conjugated goat anti-mouse Ig. ΔMFI indicates the difference in geometric mean fluorescence intensity between AML stained with BB7.2 and goat anti-mouse Ig and AML stained with goat anti-mouse Ig only.

**Table S5.  $\Delta$ NPM1 gene expression and variant allele frequencies by RNA-sequencing<sup>A</sup>**

| AML   | NPM1 CDS <sup>B</sup> | VAF <sup>C</sup> | $\Delta$ NPM1 Protein | NPM1 reads | Total reads | NPM1/total reads |
|-------|-----------------------|------------------|-----------------------|------------|-------------|------------------|
| 9559  | c.859_860insTCTG      | 34.47            | p.Trp288CysfsTer12    | 9498       | 103961552   | 0.0000913607     |
| 7170  | c.859_860insTCTG      | 35.28            | p.Trp288CysfsTer12    | 12988      | 111732282   | 0.000116242      |
| 8861  | c.860_861insCTGC      | 27.21            | p.Trp288CysfsTer12    | 21735      | 101868266   | 0.000213364      |
| 10418 | c.859_860insTCTG      | 37.08            | p.Trp288CysfsTer12    | 30907      | 139712362   | 0.000221219      |
| 10594 | c.859_860insTCTG      | 33.29            | p.Trp288CysfsTer12    | 17041      | 148624447   | 0.000114658      |
| 10833 | c.859_860insTCTG      | 32.17            | p.Trp288CysfsTer12    | 10129      | 128443731   | 0.0000788594     |
| 3361  | c.859_860insTCTG      | 46.33            | p.Trp288CysfsTer12    | 21222      | 118571640   | 0.00017898       |
| 6395  | c.859_860insTCTG      | 31.97            | p.Trp288CysfsTer12    | 6310       | 160372609   | 0.0000393459     |
| 10197 | c.860_861insCTGC      | 35.74            | p.Trp288CysfsTer12    | 15039      | 105485637   | 0.000142569      |

<sup>A</sup> Paired-end RNA sequencing with a read length of 126 bp was performed on an Illumina HiSeq 2500 v4 sequencer to at least 12.5 Gbp per case. Mutations were detected by VARSCAN.

<sup>B</sup> Indicated is the position and type of *NPM1* mutation in the coding sequence (CDS).

<sup>C</sup> VAF, variant allele frequency.
